# Supplementary material for: Ultraviolet Photodetector Based on a Beta-Gallium Oxide/Nickel Oxide/Beta-Gallium Oxide Heterojunction Structure
Source: MDPI journal article supplement (doi:10.3390/s23198332), 2023-10-09
Supplement: s1 [file s1]

Supplemental data

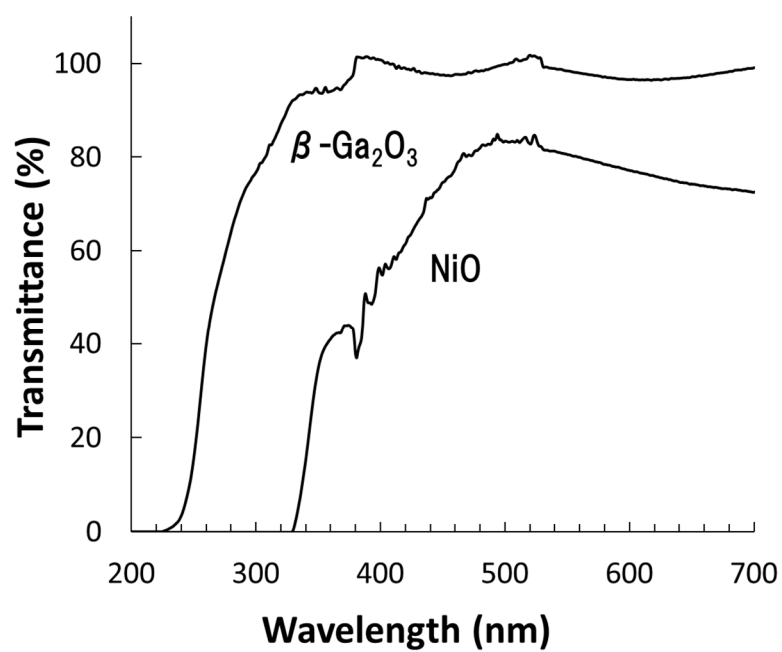

Figure S1. Optical transmission spectra of Li-doped NiO and  $\beta$ -Ga<sub>2</sub>O<sub>3</sub> films formed on sapphire substrate.
